# Supplementary material for: Oximated ruthenium tris-bipyridyl complex: synthesis and luminescent response specifically for ClO− in water containing multiple ions
Source: Royal Society of Chemistry journal article supplement (doi:10.1039/c5dt02097b), 2015-01-01
Supplement: c5dt02097b1.pdf [file c5dt02097b1.pdf]

## Oximated Ruthenium Tris-bipyridyl Complex: Synthesis and Luminescent Response Specifically for ClO<sup>-</sup> in Water Containing Multiple Ions

### Supporting Information

#### Various Spectra

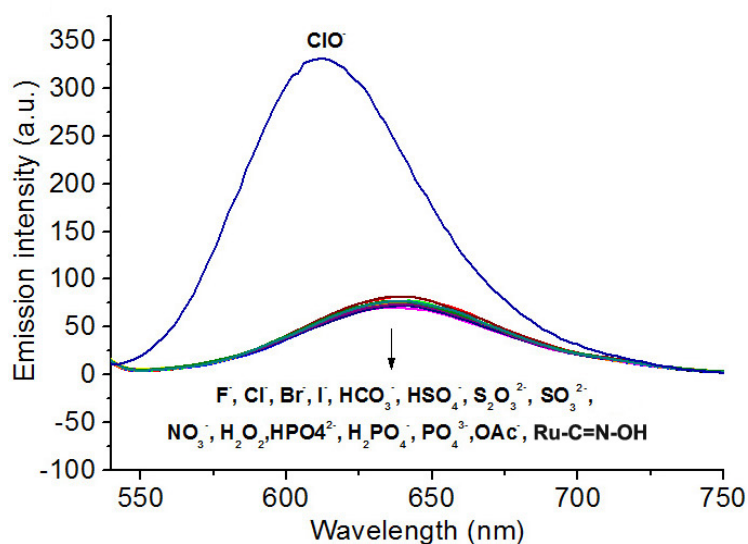

**Figure S-1.** Luminescence emission spectrum of Ru-C=N-OH (10  $\mu$ M) upon addition of 20 equiv of various metal ions (F<sup>-</sup>, Cl<sup>-</sup>, Br<sup>-</sup>, I<sup>-</sup>, HCO<sub>3</sub><sup>-</sup>, HSO<sub>4</sub><sup>-</sup>, H<sub>2</sub>PO<sub>4</sub><sup>-</sup>, S<sub>2</sub>O<sub>3</sub><sup>2-</sup>, SO<sub>3</sub><sup>2-</sup>, NO<sub>3</sub><sup>-</sup>, H<sub>2</sub>O<sub>2</sub>, HPO<sub>4</sub><sup>2-</sup>, H<sub>2</sub>PO<sub>4</sub><sup>-</sup>, PO<sub>4</sub><sup>3-</sup>, OAc<sup>-</sup>, Ru-C=N-OH) in water.

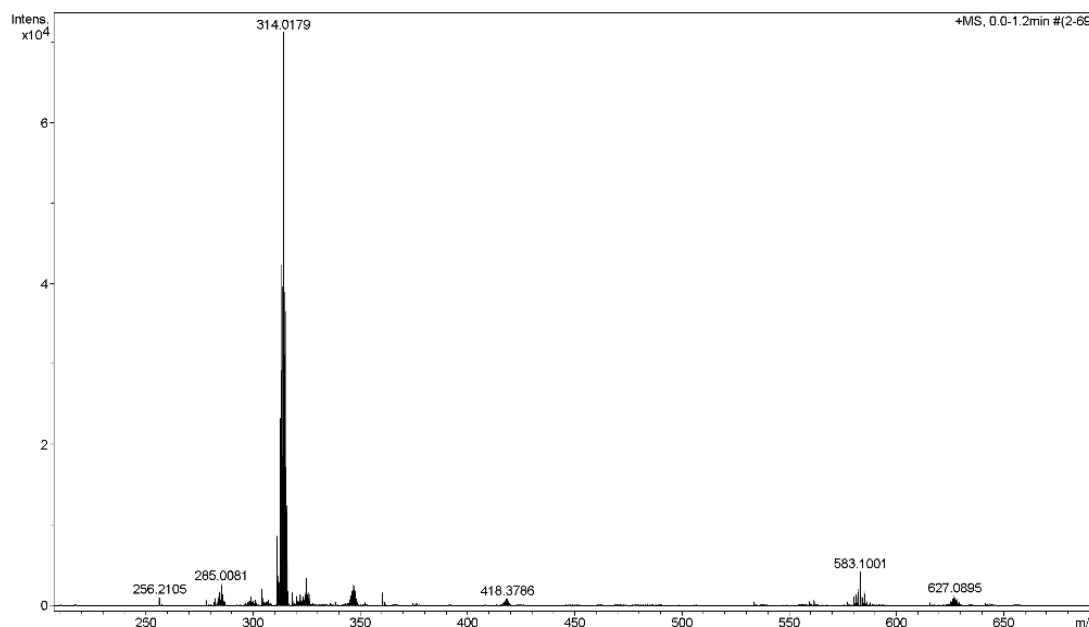

**Figure S-2.** TOF-MS spectrum of isolated complex from the reaction of Ru-C=N-OH and ClO<sup>-</sup>. The peaks at  $m/z = 314.0179$  correspond to  $[M-2PF_6^-]^{2+}$  (calc. 314.0579).

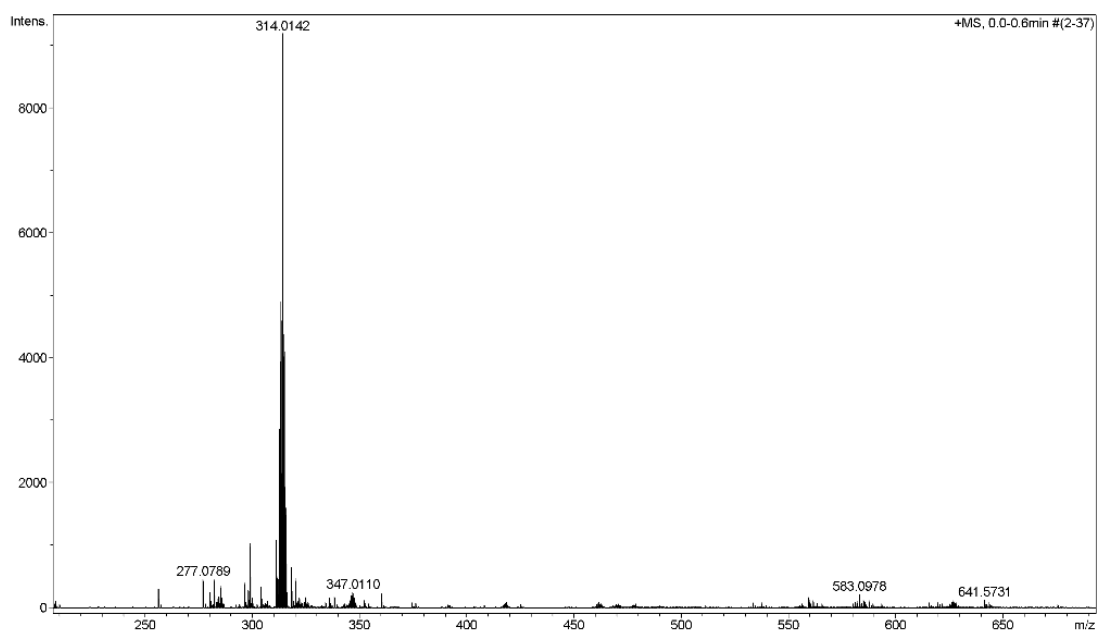

**Figure S-3.** TOF-MS spectrum of Ru-COOH. The peaks at  $m/z = 314.0142$  correspond to  $[M-2PF_6^-]^{2+}$  (calc.314.0579).

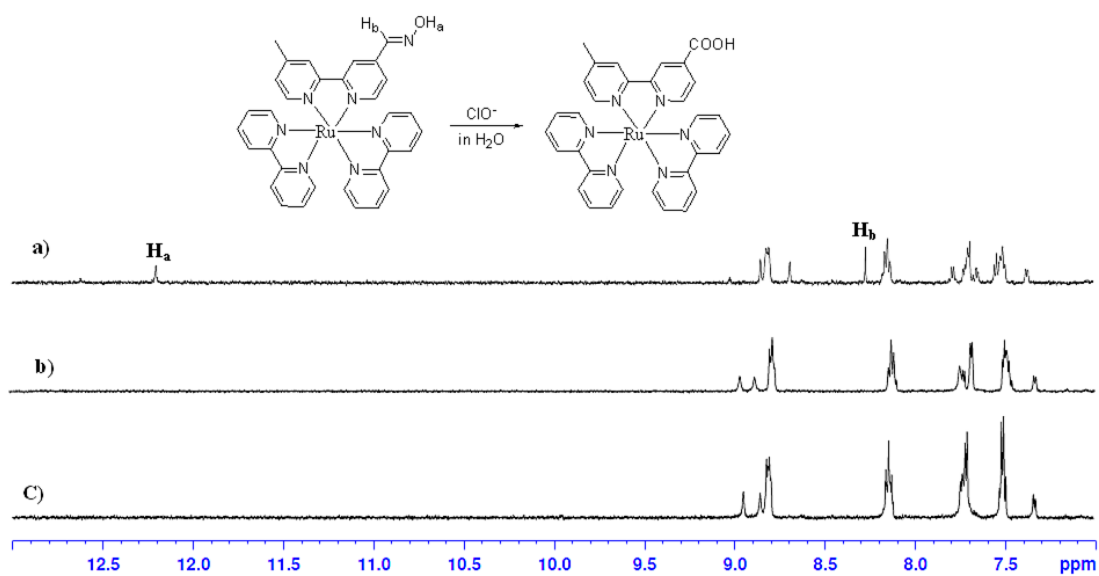

**Figure S-4.**  $^1H$  NMR spectra in  $d_6$ -DMSO solutions. (a) Ru-C=N-OH; (b) Isolated product from the reaction of Ru-C=N-OH with  $ClO^-$ ; (c) Ru-CO<sub>2</sub>H.

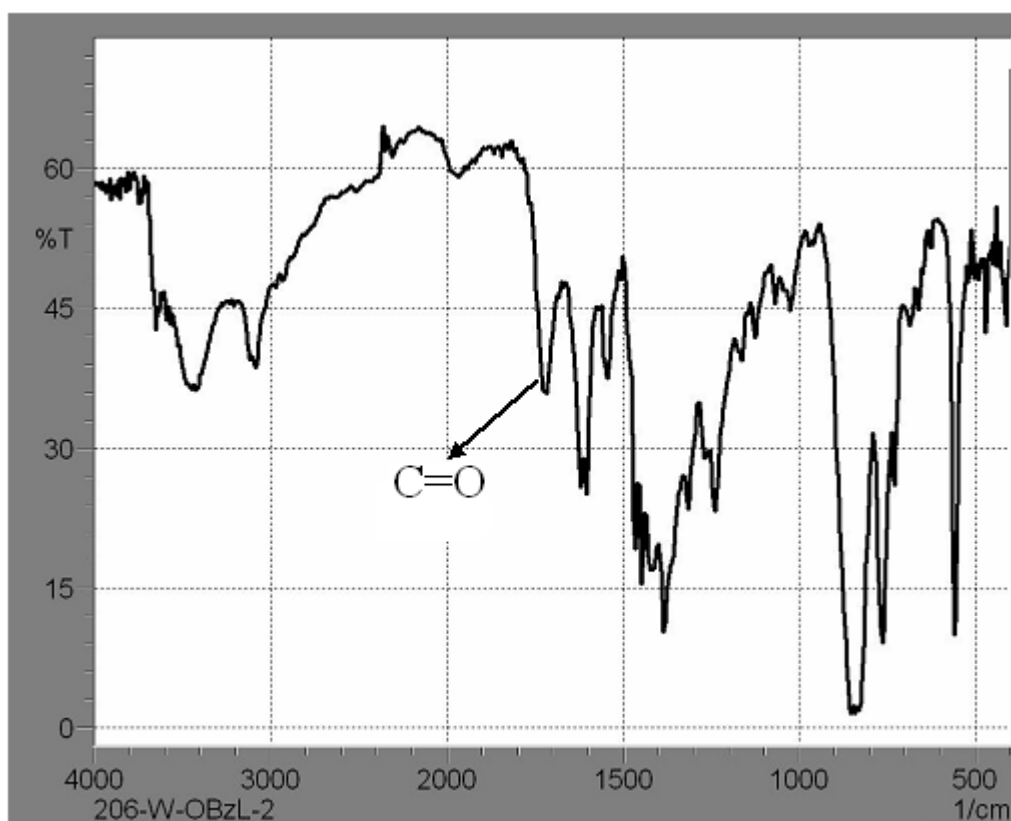

**Figure S-5.** IR spectrum of isolated complex from the reaction of Ru-C=N-OH and ClO<sup>-</sup>.

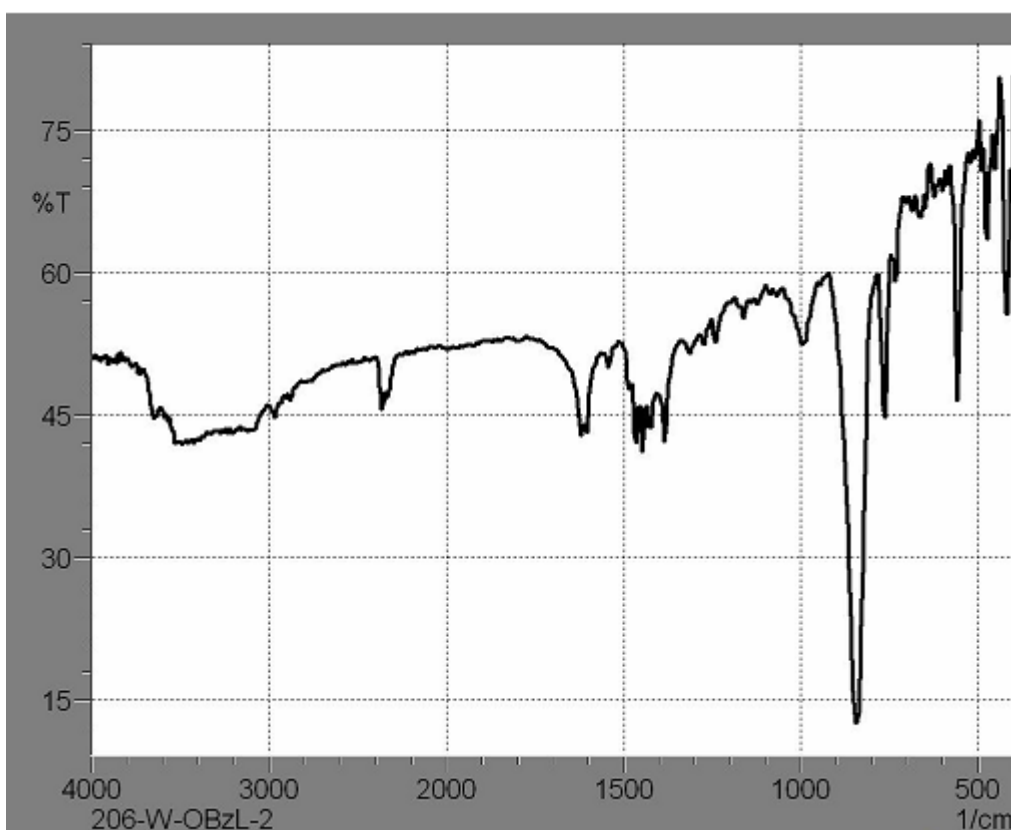

**Figure S-6.** IR spectrum of Ru-C=N-OH.
